# Supplementary material
Source: HighWire-hosted journal article supplement (https://bmjopen.bmj.com/content/12/8/e059614)
Supplement: inline-supplementary-material-1 [file inline-supplementary-material-1.pdf]

**Suppl. table 1. Clinical characteristics in patients with low and high Ed/Ea before discharge and 1 year after discharge: cutoff point of Ed/Ea for all-cause mortality**

|                                       | Ed/Ea: Before discharge        |                                | <i>p-value</i><br>( <i>low vs. high</i> ) | Ed/Ea: 1 Year after            |                                | <i>p-value</i><br>( <i>low vs. high</i> ) |
|---------------------------------------|--------------------------------|--------------------------------|-------------------------------------------|--------------------------------|--------------------------------|-------------------------------------------|
|                                       | low ( $\leq$<br>0.132)         | high ( $>0.132$ )              |                                           | low ( $\leq$<br>0.132)         | high<br>( $>0.132$ )           |                                           |
|                                       | n = 398                        | n = 261                        |                                           | n = 229                        | n = 115                        |                                           |
| <b>All-cause mortality, n (%)</b>     | <b>26 (7)</b>                  | <b>45 (17)</b>                 | <b><i>&lt;0.001</i></b>                   | <b>10 (4)</b>                  | <b>14 (12)</b>                 | <b><i>0.007</i></b>                       |
| <b>Age, years</b>                     | <b>80 <math>\pm</math> 9</b>   | <b>83 <math>\pm</math> 9</b>   | <b><i>0.001</i></b>                       | <b>80 <math>\pm</math> 9</b>   | <b>83 <math>\pm</math> 7</b>   | <b><i>0.001</i></b>                       |
| <b>Male sex, n (%)</b>                | <b>204 (51)</b>                | <b>92 (35)</b>                 | <b><i>&lt;0.001</i></b>                   | <b>110 (48)</b>                | <b>47 (41)</b>                 | <b><i>0.126</i></b>                       |
| <b>Systolic blood pressure, mmHg</b>  | <b>122 <math>\pm</math> 19</b> | <b>120 <math>\pm</math> 19</b> | <b><i>0.238</i></b>                       | <b>132 <math>\pm</math> 21</b> | <b>128 <math>\pm</math> 22</b> | <b><i>0.082</i></b>                       |
| <b>Diastolic blood pressure, mmHg</b> | <b>66 <math>\pm</math> 12</b>  | <b>64 <math>\pm</math> 11</b>  | <b><i>0.017</i></b>                       | <b>70 <math>\pm</math> 13</b>  | <b>65 <math>\pm</math> 11</b>  | <b><i>0.003</i></b>                       |
| <b>Heart rate, bpm</b>                | <b>70 <math>\pm</math> 15</b>  | <b>70 <math>\pm</math> 15</b>  | <b><i>0.731</i></b>                       | <b>70 <math>\pm</math> 15</b>  | <b>68 <math>\pm</math> 13</b>  | <b><i>0.157</i></b>                       |
| <b>Atrial fibrillation, n (%)</b>     | <b>178 (45)</b>                | <b>112 (43)</b>                | <b><i>0.646</i></b>                       | <b>106 (46)</b>                | <b>46 (40)</b>                 | <b><i>0.160</i></b>                       |
| <b>Coronary artery disease, n (%)</b> | <b>64 (16)</b>                 | <b>58 (22)</b>                 | <b><i>0.029</i></b>                       | <b>32 (14)</b>                 | <b>31 (27)</b>                 | <b><i>0.002</i></b>                       |
| <b>Diabetes mellitus, n (%)</b>       | <b>134 (34)</b>                | <b>99 (38)</b>                 | <b><i>0.150</i></b>                       | <b>81 (35)</b>                 | <b>45 (39)</b>                 | <b><i>0.286</i></b>                       |
| <b>Dyslipidemia, n (%)</b>            | <b>155 (39)</b>                | <b>115 (44)</b>                | <b><i>0.110</i></b>                       | <b>97 (42)</b>                 | <b>59 (51)</b>                 | <b><i>0.072</i></b>                       |

|                                  |                 |                 |              |                 |                 |              |
|----------------------------------|-----------------|-----------------|--------------|-----------------|-----------------|--------------|
| <b>Hypertension, n (%)</b>       | <b>330 (83)</b> | <b>235 (90)</b> | <b>0.007</b> | <b>199 (87)</b> | <b>101 (88)</b> | <b>0.471</b> |
| <i>Laboratory data</i>           |                 |                 |              |                 |                 |              |
| Albumin, g/dL                    | 3.4 ± 0.5       | 3.4 ± 0.5       | 0.934        | 3.9 ± 0.4       | 3.8 ± 0.5       | 0.022        |
| eGFR, mL/min/1.73 m <sup>2</sup> | 45 ± 19         | 41 ± 19         | 0.009        | 44 ± 19         | 35 ± 18         | <0.001       |
| Hemoglobin, g/dL                 | 11.5 ± 2.0      | 11.2 ± 2.0      | 0.057        | 12.0 ± 1.7      | 11.5 ± 1.9      | 0.007        |
| NT-proBNP, pg/mL                 | 1957 ± 3634     | 3483 ± 8136     | 0.001        | 1755 ± 2921     | 4608 ± 8051     | <0.001       |
| <i>Echocardiographic data</i>    |                 |                 |              |                 |                 |              |
| LAD, mm                          | 43 ± 9          | 45 ± 8          | 0.004        | 44 ± 9          | 46 ± 7          | 0.033        |
| LAVI, mL/m <sup>2</sup>          | 52 ± 25         | 56 ± 24         | 0.045        | 53 ± 27         | 55 ± 20         | 0.598        |
| SV/LAV                           | 0.74 ± 0.36     | 0.66 ± 0.33     | 0.015        | 0.72 ± 0.33     | 0.63 ± 0.31     | 0.038        |
| SV, mL                           | 50 ± 19         | 50 ± 21         | 0.999        | 50 ± 18         | 47 ± 18         | 0.275        |
| LVESV, mL                        | 34 ± 18         | 32 ± 17         | 0.091        | 33 ± 17         | 29 ± 12         | 0.011        |
| LVEDV, mL                        | 83 ± 34         | 81 ± 35         | 0.385        | 83 ± 30         | 76 ± 28         | 0.043        |
| LVEF, %                          | 60 ± 8          | 61 ± 8          | 0.105        | 62 ± 8          | 62 ± 9          | 0.906        |
| LVMI, g/m <sup>2</sup>           | 104 ± 32        | 110 ± 36        | 0.017        | 99 ± 31         | 107 ± 31        | 0.013        |
| E, m/sec                         | 0.72 ± 0.22     | 1.02 ± 0.31     | <0.001       | 0.75 ± 0.24     | 1.01 ± 0.31     | <0.001       |
| mean e', cm/sec                  | 7.1 ± 2.1       | 5.5 ± 1.7       | <0.001       | 6.8 ± 2.2       | 6.0 ± 1.9       | <0.001       |
| DcT, sec                         | 0.21 ± 0.06     | 0.23 ± 0.08     | 0.002        | 0.21 ± 0.06     | 0.22 ± 0.09     | 0.378        |
| <i>Medications</i>               |                 |                 |              |                 |                 |              |
| Beta-blockers, %                 | 52              | 58              | 0.131        | 50              | 59              | 0.104        |

|                                    |           |           |              |           |           |              |
|------------------------------------|-----------|-----------|--------------|-----------|-----------|--------------|
| <b>Calcium-channel blockers, %</b> | <b>50</b> | <b>54</b> | <b>0.296</b> | <b>47</b> | <b>54</b> | <b>0.218</b> |
| <b>Diuretics, %</b>                | <b>81</b> | <b>86</b> | <b>0.138</b> | <b>77</b> | <b>85</b> | <b>0.083</b> |
| <b>RAAS-I, %</b>                   | <b>73</b> | <b>75</b> | <b>0.413</b> | <b>71</b> | <b>67</b> | <b>0.391</b> |
| <b>Statins, %</b>                  | <b>31</b> | <b>35</b> | <b>0.258</b> | <b>34</b> | <b>39</b> | <b>0.318</b> |

All-cause mortality was evaluated for 2 years per year.

Values are mean  $\pm$  standard deviation or number (%).

DcT, deceleration time of E wave;

Ed, diastolic elastance; Ea, arterial elastance; eGFR, estimated glomerular filtration rate;

NT-proBNP, N-terminal pro-brain natriuretic peptide; LAD, left atrial diameter;

LAVI, left atrial volume index; SV, stroke volume; LAV, left atrial volume;

LVEF, left ventricular ejection fraction; LVESV, left ventricular end-systolic volume;

LVEDV, left ventricular end-diastolic volume; LVMI, left ventricular mass index;

RAAS-I, renin-angiotensin-aldosterone system inhibitors
